# Supplementary material for: Down in the dungeons: microbial redox reactions and geochemical transformations define the biogeochemistry of an estuarine sediment column
Source: Copernicus journal article supplement (doi:10.5194/bg-2023-62), 2023-04-13
Supplement: Supplementary file 1 [file bg-2023-62-supplement.pdf]

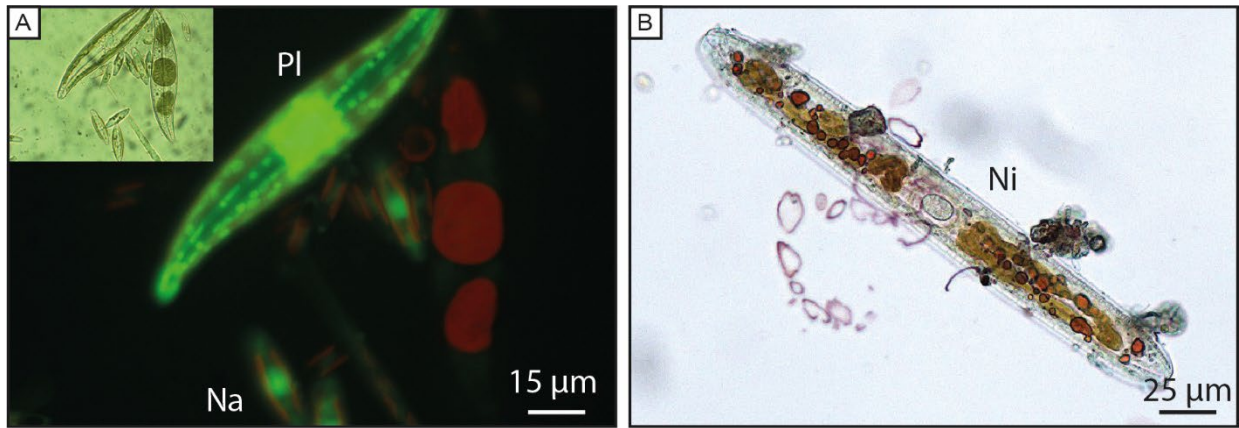

1  
2 **Figure S1:** FDA and TTC assays positive controls observed on microbiological preparations from the surface  
3 biofilm. Diatom genera: Na: *Navicula*, PI: *Pleurosigma* and Ni: *Nitzschia*. (A) FDA assay. Green fluorescence  
4 indicates zones of active FDA hydrolysis. In this diatom cell, the hydrolytic activity is located close to the nucleus  
5 and in the lipid vesicles. Chloroplasts have a red autofluorescence due to the presence of chlorophyll. (B) TTC  
6 assay. The polarizing microscope image shows organelles (mainly mitochondria) stained in red by formazan.

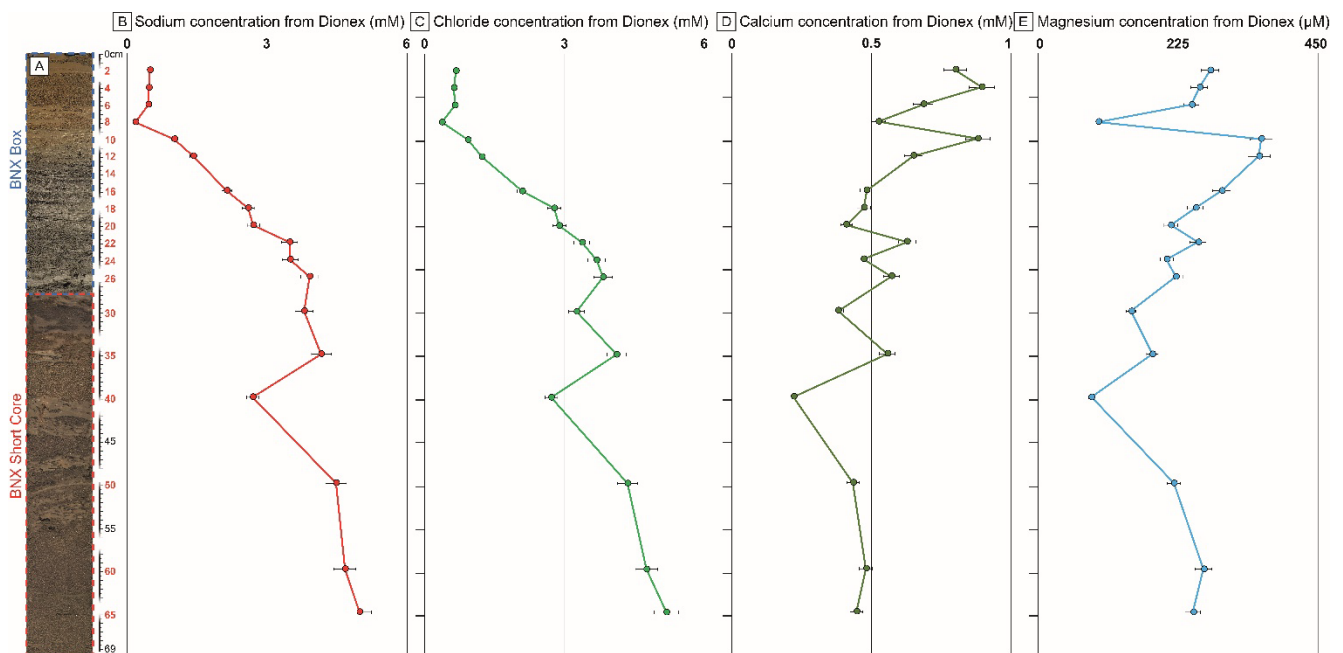

8 **Figure S2:** Porewater concentration profiles of dissolved elements in BXN-B and BXN-SC in function of depth.  
9 (A) picture of BXN-B (circled in blue) merged with BXN-SC (circled in red). Profiles of sodium (B, red), chloride  
10 (C, light green), calcium (D, dark green) and magnesium (E, blue) concentrations measured by ion  
11 chromatography.

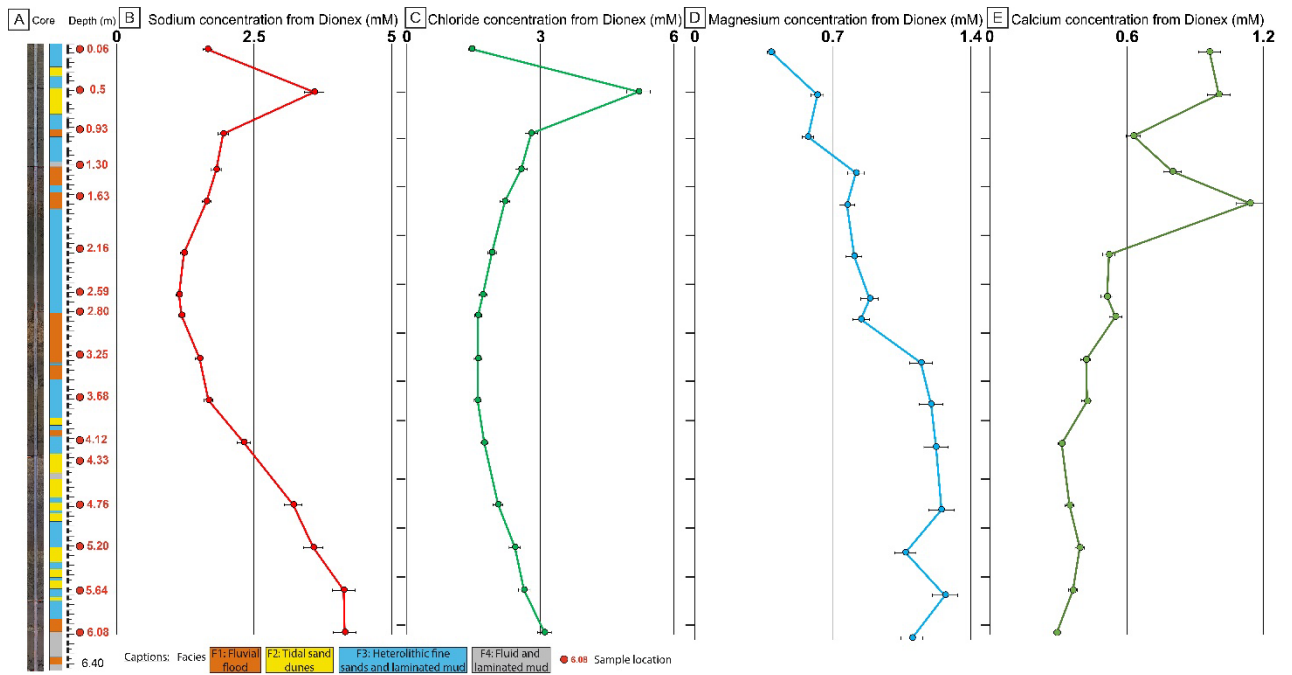

12

13 **Figure S3:** Porewater concentration profiles of dissolved elements in BXN-LC in function of depth. (A) Picture  
 14 and sedimentological interpretation of BXN-LC. Profiles of sodium (B, red), chloride (C, light green), magnesium  
 15 (D, blue) and calcium (E, dark green) concentrations measured by ion chromatography.

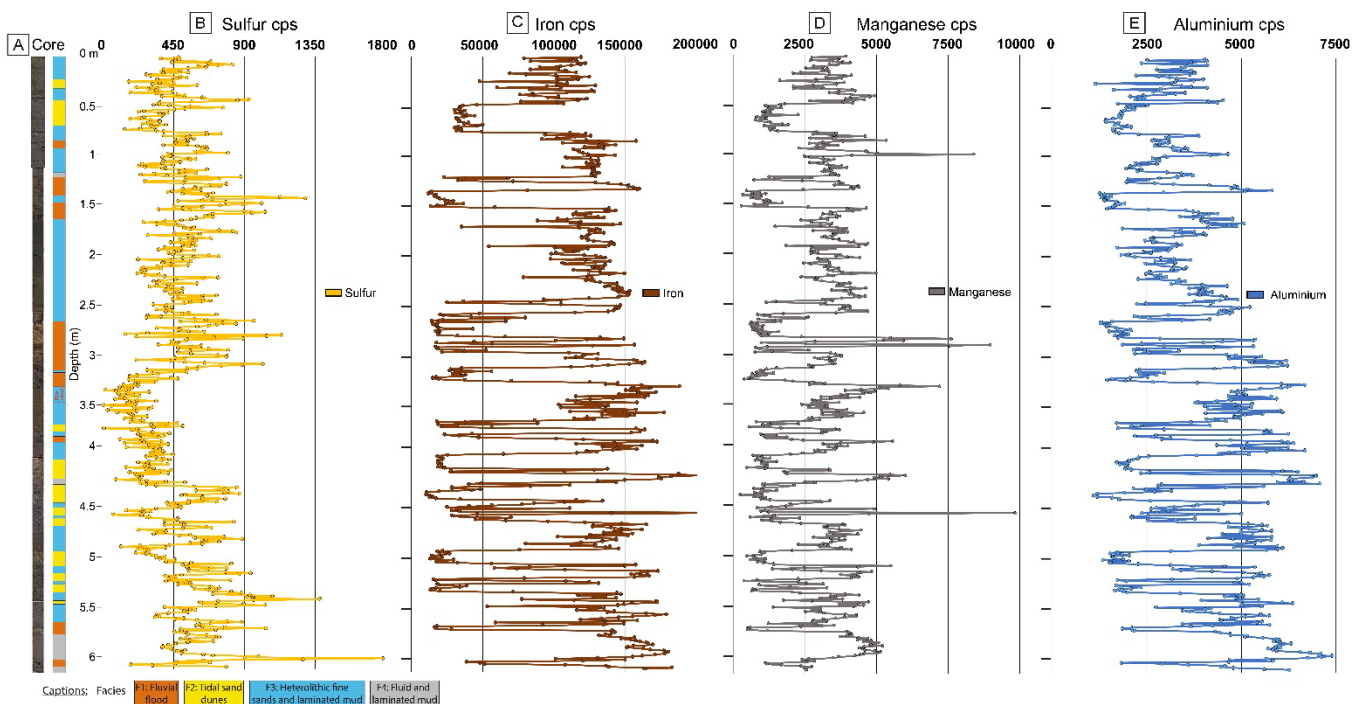

17 **Figure S4:** (A) Picture and sedimentological interpretation of BXN-LC. Plot of selected elements: sulfur (B,  
 18 yellow), iron (C, brown), manganese (D, grey) and aluminum (E, blue) measured by core-scale XRF on BXN-LC.

| BNX-BOX and BNX-SC  |    | Dionex           |          |                 |          |                |         |       |         |       |         |      |         |                               |         |
|---------------------|----|------------------|----------|-----------------|----------|----------------|---------|-------|---------|-------|---------|------|---------|-------------------------------|---------|
| Depth               | cm | Na               |          | K               |          | Mg             |         | Ca    |         | Cl    |         | NO3  |         | SO <sub>4</sub> <sup>2-</sup> |         |
|                     |    | mg/L             | std dev  | mg/L            | std dev  | mg/L           | std dev | mg/L  | std dev | mg/L  | std dev | mg/L | std dev | mg/L                          | std dev |
| 2                   |    | 11,33            | 0,57     | 2,16            | 0,11     | 7,37           | 0,37    | 31,99 | 1,60    | 17,8  | 0,89    | 0    | 0       | 8,39                          | 0,42    |
| 4                   |    | 10,76            | 0,54     | 2,49            | 0,12     | 6,91           | 0,35    | 35,79 | 1,79    | 16,7  | 0,83    | 0    | 0       | 7,73                          | 0,39    |
| 6                   |    | 10,56            | 0,53     | 1,93            | 0,10     | 6,57           | 0,33    | 27,42 | 1,37    | 17,3  | 0,86    | 0,11 | 0,01    | 4,88                          | 0,24    |
| 8                   |    | 4,16             | 0,21     | 1,51            | 0,08     | 2,56           | 0,13    | 20,99 | 1,05    | 9,9   | 0,49    | 6,10 | 0,30    | 8,39                          | 0,42    |
| 10                  |    | 23,57            | 1,18     | 2,69            | 0,13     | 9,56           | 0,48    | 35,21 | 1,76    | 24,7  | 1,23    | 1,83 | 0,09    | 9,24                          | 0,46    |
| 12                  |    | 33,01            | 1,65     | 3,42            | 0,17     | 9,46           | 0,47    | 26,02 | 1,30    | 32,8  | 1,64    | 2,84 | 0,14    | 7,54                          | 0,38    |
| 16                  |    | 49,90            | 2,49     | 3,62            | 0,18     | 7,86           | 0,39    | 19,33 | 0,97    | 55,9  | 2,79    | 0,05 | 0,00    | 3,26                          | 0,16    |
| 18                  |    | 60,63            | 3,03     | 3,38            | 0,17     | 6,74           | 0,34    | 18,93 | 0,95    | 74,1  | 3,70    | 0,01 | 0,00    | 0,00                          | 0,00    |
| 20                  |    | 63,20            | 3,16     | 3,77            | 0,19     | 5,68           | 0,28    | 16,39 | 0,82    | 77,0  | 3,85    | 0    | 0       | 2,00                          | 0,10    |
| 22                  |    | 81,28            | 4,06     | 4,17            | 0,21     | 6,85           | 0,34    | 25,10 | 1,25    | 90,0  | 4,50    | 0    | 0       | 0,00                          | 0,00    |
| 24                  |    | 81,57            | 4,08     | 4,08            | 0,20     | 5,50           | 0,28    | 18,87 | 0,94    | 98,3  | 4,91    | 0    | 0       | 0,71                          | 0,04    |
| 26                  |    | 91,31            | 4,57     | 3,15            | 0,16     | 5,89           | 0,29    | 22,87 | 1,14    | 102,0 | 5,10    | 0    | 0       | 1,13                          | 0,01    |
| 30                  |    | 88,56            | 4,43     | 4,52            | 0,23     | 3,98           | 0,20    | 15,24 | 0,76    | 86,9  | 4,34    | 0,06 | 0,00    | 7,80                          | 0,39    |
| 35                  |    | 97,18            | 4,86     | 7,22            | 0,36     | 4,89           | 0,24    | 22,28 | 1,11    | 109,9 | 5,50    | 0    | 0       | 0,24                          | 0,01    |
| 40                  |    | 62,93            | 3,15     | 2,83            | 0,14     | 2,28           | 0,11    | 8,87  | 0,44    | 72,5  | 3,62    | 0    | 0       | 5,90                          | 0,30    |
| 50                  |    | 104,62           | 5,23     | 3,14            | 0,16     | 5,80           | 0,29    | 17,38 | 0,87    | 116,1 | 5,82    | 0    | 0       | 0,02                          | 0,00    |
| 60                  |    | 109,00           | 5,45     | 3,51            | 0,18     | 7,08           | 0,35    | 19,23 | 0,96    | 126,9 | 6,34    | 0    | 0       | 0,00                          | 0,00    |
| 65                  |    | 116,37           | 5,82     | 3,84            | 0,19     | 6,63           | 0,33    | 17,86 | 0,89    | 138,5 | 6,93    | 0    | 0       | 0,10                          | 0,01    |
| Microelectrodes     |    | O <sub>2</sub>   |          | S <sub>2</sub>  |          | pH             |         |       |         |       |         |      |         |                               |         |
| Depth               | cm | μM               | std dev  | μM              | std dev  | μM             | std dev | μM    | std dev | μM    | std dev | μM   | std dev | μM                            | std dev |
| 2                   |    | 4,65             | 2,22     | 0,0             | 0,00     | 8,00           | 0,03    |       |         |       |         |      |         |                               |         |
| 4                   |    | 11               | 3,56     | 1,0             | 0,00     | 7,93           | 0,02    |       |         |       |         |      |         |                               |         |
| 6                   |    | 0,75             | 0,96     | 6,0             | 2,00     | 8,03           | 0,04    |       |         |       |         |      |         |                               |         |
| 8                   |    | 6,75             | 3,40     | 26,8            | 4,90     | 8,15           | 0,04    |       |         |       |         |      |         |                               |         |
| 10                  |    | 5                | 2,58     | 73,3            | 13,48    | 8,18           | 0,01    |       |         |       |         |      |         |                               |         |
| 12                  |    | 6,25             | 2,06     | 109,8           | 19,28    | 8,22           | 0,03    |       |         |       |         |      |         |                               |         |
| 16                  |    | 0,5              | 1,00     | 171,0           | 10,59    | 8,22           | 0,03    |       |         |       |         |      |         |                               |         |
| 18                  |    | 0,25             | 0,50     | 199,5           | 9,63     | 8,23           | 0,01    |       |         |       |         |      |         |                               |         |
| 20                  |    | 0                | 0,00     | 239,8           | 7,51     | 8,23           | 0,03    |       |         |       |         |      |         |                               |         |
| 22                  |    | 0,5              | 1,00     | 189,0           | 19,21    | 8,25           | 0,01    |       |         |       |         |      |         |                               |         |
| 24                  |    | 0,25             | 0,50     | 157,3           | 13,39    | 8,23           | 0,01    |       |         |       |         |      |         |                               |         |
| 26                  |    | 0                | 0,00     | NA              | NA       | 8,20           | 0,02    |       |         |       |         |      |         |                               |         |
| 30                  |    | 0,25             | 0,50     | 152,3           | 4,04     | 8,19           | 0,01    |       |         |       |         |      |         |                               |         |
| 35                  |    | 0                | 0,00     | 159,7           | 7,37     | 8,25           | 0,01    |       |         |       |         |      |         |                               |         |
| 40                  |    | 0                | 0,00     | 163,3           | 26,50    | 8,21           | 0,02    |       |         |       |         |      |         |                               |         |
| 50                  |    | 0                | 0,00     | 129,0           | 3,16     | 8,22           | 0,02    |       |         |       |         |      |         |                               |         |
| 60                  |    | 0                | 0,00     | 165,5           | 3,42     | 8,18           | 0,03    |       |         |       |         |      |         |                               |         |
| 65                  |    | 0                | 0,00     | NA              | NA       | 8,15           | 0,03    |       |         |       |         |      |         |                               |         |
| ICP                 |    | Ca               |          | Fe              |          | Mn             |         | Mg    |         | Pb    |         | Zn   |         |                               |         |
| Depth               | cm | mg/L             | std dev  | mg/L            | std dev  | mg/L           | std dev | mg/L  | std dev | μg/L  | std dev | μg/L | std dev | μg/L                          | std dev |
| 2                   |    | 19               | 7        | 0               | 0        | 5              | 2       | 0,045 | 0,014   | 0     | 0       | 80   | 24      |                               |         |
| 4                   |    | 17               | 6        | 0,00            | 0        | 5,3            | 2,1     | 0,15  | 0,005   | 0     | 0       | 110  | 33      |                               |         |
| 6                   |    | 16               | 6        | 0,00            | 0,001    | 4,9            | 2       | 0,29  | 0,009   | 0,1   | 0,04    | 120  | 36      |                               |         |
| 8                   |    | N.A              | N.A      | N.A             | N.A      | N.A            | N.A     | N.A   | N.A     | N.A   | N.A     | N.A  | N.A     |                               |         |
| 10                  |    | 19               | 7        | 0,00            | 0        | 7,5            | 3       | 0,28  | 0,008   | 0     | 0       | 76   | 23      |                               |         |
| 12                  |    | N.A              | N.A      | N.A             | N.A      | N.A            | N.A     | N.A   | N.A     | N.A   | N.A     | N.A  | N.A     |                               |         |
| 16                  |    | 14               | 5        | 0,04            | 0,015    | 6,4            | 2,6     | 0,3   | 0,009   | 0     | 0       | 87   | 26      |                               |         |
| 18                  |    | 11               | 4        | 0,15            | 0,053    | 4,6            | 1,8     | 0,4   | 0,001   | 0,1   | 0,04    | 73   | 22      |                               |         |
| 20                  |    | N.A              | N.A      | N.A             | N.A      | N.A            | N.A     | N.A   | N.A     | N.A   | N.A     | N.A  | N.A     |                               |         |
| 22                  |    | 11               | 4        | 0,02            | 0,008    | 4              | 1,6     | 0,32  | 0,096   | 0     | 0       | 190  | 57      |                               |         |
| 24                  |    | 5,4              | 1,9      | 0,00            | 0,001    | 2,1            | 0,8     | 0,014 | 0,004   | 0     | 0       | 95   | 28      |                               |         |
| 26                  |    | 13               | 5        | 0,14            | 0,049    | 4,3            | 1,7     | 0,49  | 0,15    | 0,5   | 0,13    | 93   | 28      |                               |         |
| 30                  |    | N.A              | N.A      | N.A             | N.A      | N.A            | N.A     | N.A   | N.A     | N.A   | N.A     | N.A  | N.A     |                               |         |
| 35                  |    | 11               | 4        | 0,00            | 0,002    | 4,4            | 1,8     | 0,3   | 0,09    | 0,5   | 0,13    | 45   | 14      |                               |         |
| 40                  |    | N.A              | N.A      | N.A             | N.A      | N.A            | N.A     | N.A   | N.A     | N.A   | N.A     | N.A  | N.A     |                               |         |
| 50                  |    | 12               | 4        | 0,07            | 0,023    | 4,9            | 2       | 0,46  | 0,014   | 0     | 0       | 50   | 15      |                               |         |
| 60                  |    | 12               | 4        | 0,01            | 0,004    | 5,3            | 2,1     | 0,24  | 0,007   | 0     | 0       | 95   | 29      |                               |         |
| 65                  |    | 2,2              | 0,8      | 0,00            | 0,001    | 0,93           | 0,4     | 0,068 | 0,002   | 0     | 0       | 0    | 0       |                               |         |
| Colorimetric assays |    | TTC              |          | FDA             |          |                |         |       |         |       |         |      |         |                               |         |
| Depth               | cm | mol TTC /h/g sed | std dev  | mol FDA/h/g sed | std dev  | mg FDA/h/g sed | std dev |       | std dev |       | std dev |      | std dev |                               | std dev |
| 2                   |    | 1,58E-04         | 1,60E-05 | 2,93E-05        | 6,42E-07 |                |         |       |         |       |         |      |         |                               |         |
| 4                   |    | 3,73E-05         | 4,16E-06 | 3,33E-05        | 5,75E-07 |                |         |       |         |       |         |      |         |                               |         |
| 6                   |    | 8,06E-05         | 3,79E-05 | 3,14E-05        | 1,39E-06 |                |         |       |         |       |         |      |         |                               |         |
| 8                   |    | N.A              | N.A      | N.A             | N.A      |                |         |       |         |       |         |      |         |                               |         |
| 10                  |    | 1,36E-04         | 5,88E-05 | 1,91E-05        | 1,08E-06 |                |         |       |         |       |         |      |         |                               |         |
| 12                  |    | N.A              | N.A      | N.A             | N.A      |                |         |       |         |       |         |      |         |                               |         |
| 16                  |    | 1,71E-04         | 3,68E-05 | 1,87E-05        | 8,11E-07 |                |         |       |         |       |         |      |         |                               |         |
| 18                  |    | N.A              | N.A      | N.A             | N.A      |                |         |       |         |       |         |      |         |                               |         |
| 20                  |    | 1,84E-04         | 2,76E-05 | 1,89E-05        | 6,24E-07 |                |         |       |         |       |         |      |         |                               |         |
| 22                  |    | N.A              | N.A      | N.A             | N.A      |                |         |       |         |       |         |      |         |                               |         |
| 24                  |    | N.A              | N.A      | N.A             | N.A      |                |         |       |         |       |         |      |         |                               |         |
| 26                  |    | 1,91E-04         | 2,06E-06 | 1,90E-05        | 1,20E-06 |                |         |       |         |       |         |      |         |                               |         |
| 30                  |    | 1,75E-04         | 2,19E-05 | 1,69E-05        | 1,03E-07 |                |         |       |         |       |         |      |         |                               |         |
| 35                  |    | 6,81E-05         | 4,68E-06 | 1,19E-05        | 1,80E-06 |                |         |       |         |       |         |      |         |                               |         |
| 40                  |    | 2,87E-05         | 5,66E-06 | 1,84E-05        | 3,25E-06 |                |         |       |         |       |         |      |         |                               |         |
| 50                  |    | 7,30E-05         | 4,88E-06 | 1,76E-05        | 6,32E-07 |                |         |       |         |       |         |      |         |                               |         |
| 60                  |    | 2,02E-05         | 9,16E-07 | 1,71E-05        | 7,74E-07 |                |         |       |         |       |         |      |         |                               |         |
| 65                  |    | 2,29E-05         | 7,56E-07 | 1,82E-05        | 2,93E-07 |                |         |       |         |       |         |      |         |                               |         |

| BXN-LC              |                 | Dionex          |                 |          |         |         |         |         |         |         |      |         |                               |          |     |
|---------------------|-----------------|-----------------|-----------------|----------|---------|---------|---------|---------|---------|---------|------|---------|-------------------------------|----------|-----|
| Depth               | Na              | std dev         | K               | std dev  | Mg      | std dev | Ca      | std dev | Cl      | std dev | NO3  | std dev | SO <sub>4</sub> <sup>2-</sup> | std dev  |     |
| cm                  | mg/L            | mg/L            | mg/L            | mg/L     | mg/L    | mg/L    | mg/L    | mg/L    | mg/L    | mg/L    | mg/L | mg/L    | mg/L                          | mg/L     |     |
| 6                   | 39,64           | 1,98            | 4,44            | 0,22     | 9,71    | 0,49    | 36,09   | 1,80    | 53,56   | 2,68    | 1,01 | 0,05    | 0,54                          | 2,72E-02 |     |
| 50                  | 86,14           | 4,31            | 4,95            | 0,25     | 15,57   | 0,78    | 37,67   | 1,88    | 190,97  | 9,55    | 1,39 | 0,07    | 0,13                          | 6,39E-03 |     |
| 93                  | 46,40           | 2,32            | 6,80            | 0,34     | 14,37   | 0,72    | 23,58   | 1,18    | 102,69  | 5,13    | 0,29 | 0,01    | 0,15                          | 7,52E-03 |     |
| 130                 | 43,49           | 2,17            | 5,95            | 0,30     | 20,47   | 1,02    | 30,00   | 1,50    | 94,44   | 4,72    | 0,87 | 0,04    | 0,53                          | 2,64E-02 |     |
| 163                 | 39,19           | 1,96            | 6,60            | 0,33     | 19,36   | 0,97    | 42,74   | 2,14    | 80,96   | 4,05    | 0,00 | 0,00    | 1,03                          | 5,17E-02 |     |
| 216                 | 29,29           | 1,46            | 6,39            | 0,32     | 20,24   | 1,01    | 19,57   | 0,98    | 70,30   | 3,52    | 0,01 | 0,00    | 0,01                          | 2,85E-04 |     |
| 259                 | 27,14           | 1,36            | 7,07            | 0,35     | 22,21   | 1,11    | 19,24   | 0,96    | 62,74   | 3,14    | 0,00 | 0,00    | 0,00                          | 0,00E+00 |     |
| 280                 | 28,31           | 1,42            | 7,94            | 0,40     | 21,09   | 1,05    | 20,66   | 1,03    | 59,00   | 2,95    | 0,14 | 0,01    | 0,29                          | 1,44E-02 |     |
| 325                 | 36,12           | 1,81            | 8,75            | 0,44     | 28,70   | 1,43    | 15,79   | 0,79    | 58,82   | 2,94    | 0,17 | 0,01    | 0,55                          | 2,77E-02 |     |
| 368                 | 39,99           | 2,00            | 7,18            | 0,36     | 29,98   | 1,50    | 15,96   | 0,80    | 58,46   | 2,92    | 0    | 0       | 0                             | 0        |     |
| 412                 | 55,35           | 2,77            | 6,22            | 0,31     | 30,61   | 1,53    | 11,81   | 0,59    | 63,96   | 3,20    | 0    | 0       | 0                             | 0        |     |
| 433                 | N.A             | N.A             | N.A             | N.A      | N.A     | N.A     | N.A     | N.A     | N.A     | N.A     | N.A  | N.A     | N.A                           | N.A      | N.A |
| 476                 | 77,11           | 3,86            | 6,88            | 0,34     | 31,30   | 1,57    | 13,10   | 0,66    | 75,42   | 3,77    | 0    | 0       | 0                             | 0        |     |
| 520                 | 85,84           | 4,29            | 6,45            | 0,32     | 26,75   | 1,34    | 14,78   | 0,74    | 89,00   | 4,45    | 0    | 0       | 0                             | 0        |     |
| 564                 | 99,04           | 4,95            | 7,74            | 0,39     | 31,75   | 1,59    | 13,68   | 0,68    | 96,78   | 4,84    | 0    | 0       | 0                             | 0        |     |
| 608                 | 99,46           | 4,97            | 5,56            | 0,28     | 27,57   | 1,38    | 11,04   | 0,55    | 113,58  | 5,68    | 0    | 0       | 0                             | 0        |     |
| ICP                 |                 |                 |                 |          |         |         |         |         |         |         |      |         |                               |          |     |
| Ca                  | std dev         | Mn              | std dev         | Mg       | std dev | Pb      | std dev | Zn      | std dev |         |      |         |                               |          |     |
| cm                  | mg/L            | mg/L            | mg/L            | mg/L     | mg/L    | µg/L    | µg/L    | µg/L    | µg/L    |         |      |         |                               |          |     |
| 6                   | 22              | 8               | 7,1             | 2,8      | 1,4     | 0,4     | 0,2     | 0,06    | 83      | 25      |      |         |                               |          |     |
| 50                  | 32              | 11              | 10              | 4        | 1,2     | 0,4     | 0,2     | 0,06    | 190     | 57      |      |         |                               |          |     |
| 93                  | 25              | 9               | 11              | 4        | 0,04    | 0,0     | 0,2     | 0,06    | 34      | 10      |      |         |                               |          |     |
| 130                 | 16              | 6               | 13              | 5        | 0,01    | 0,0     | 0,2     | 0,06    | 0       | 0       |      |         |                               |          |     |
| 163                 | 18              | 6               | 12              | 5        | 0,00    | 0,0     | 0,3     | 0,08    | 19      | 6       |      |         |                               |          |     |
| 216                 | 16              | 6               | 15              | 6        | 0,02    | 0,0     | 0       | 0       | 0       | 0       |      |         |                               |          |     |
| 259                 | 13              | 5               | 16              | 6        | 0,01    | 0,0     | 0       | 0       | 0       | 0       |      |         |                               |          |     |
| 280                 | 13              | 5               | 13              | 5        | 0,00    | 0,0     | 0,1     | 0,04    | 0       | 0       |      |         |                               |          |     |
| 325                 | 11              | 4               | 19              | 9        | 0,00    | 0,0     | 0       | 0       | 0       | 0       |      |         |                               |          |     |
| 368                 | 11              | 4               | 20              | 8        | 0,00    | 0,0     | 0       | 0       | 0       | 0       |      |         |                               |          |     |
| 412                 | 10              | 4               | 21              | 8        | 0,00    | 0,0     | 0,1     | 0,04    | 0       | 0       |      |         |                               |          |     |
| 433                 | 0,66            | 0,2             | 0,66            | 0,3      | 0,00    | 0,0     | 0,2     | 0,06    | 0       | 0       |      |         |                               |          |     |
| 476                 | 12              | 4               | 21              | 8        | 0,01    | 0,0     | 0,1     | 0,04    | 0       | 0       |      |         |                               |          |     |
| 520                 | 9,5             | 3,3             | 18              | 7        | 0,00    | 0,0     | 0       | 0       | 0       | 0       |      |         |                               |          |     |
| 564                 | 12              | 4               | 23              | 9        | 0,01    | 0,0     | 0,2     | 0,06    | 0       | 0       |      |         |                               |          |     |
| 608                 | 13              | 5               | 22              | 9        | 0,10    | 0,0     | 0,1     | 0,04    | 0       | 0       |      |         |                               |          |     |
| Colorimetric assays |                 |                 |                 |          |         |         |         |         |         |         |      |         |                               |          |     |
| TTC                 | std dev         | FDA             | std dev         | Fe II    | Fe III  |         |         |         |         |         |      |         |                               |          |     |
| cm                  | mol TTC/h/g sed | mol FDA/h/g sed | mol FDA/h/g sed | mg/L     | mg/L    |         |         |         |         |         |      |         |                               |          |     |
| 6                   | 5,86E-05        | 6,57E-06        | 1,74E-05        | 7,16E-07 | 0,23    | 0,14    |         |         |         |         |      |         |                               |          |     |
| 50                  | 2,19E-05        | 5,87E-06        | 1,25E-05        | 1,36E-06 | 0,94    | 0,67    |         |         |         |         |      |         |                               |          |     |
| 93                  | 5,97E-05        | 1,61E-05        | 1,35E-05        | 8,94E-08 | 0,06    | 0,62    |         |         |         |         |      |         |                               |          |     |
| 130                 | 1,56E-04        | 2,96E-05        | 1,87E-05        | 1,26E-06 | 0,22    | 1,32    |         |         |         |         |      |         |                               |          |     |
| 163                 | 2,77E-05        | 4,00E-07        | 1,45E-05        | 6,18E-06 | 0       | 0       |         |         |         |         |      |         |                               |          |     |
| 216                 | 7,32E-05        | 3,29E-05        | 1,49E-05        | 8,71E-06 | 0,22    | 1,84    |         |         |         |         |      |         |                               |          |     |
| 259                 | 4,46E-05        | 8,97E-06        | 1,42E-05        | 1,31E-05 | 0,29    | 1,76    |         |         |         |         |      |         |                               |          |     |
| 280                 | 1,33E-04        | 1,63E-05        | 1,12E-05        | 3,41E-06 | 0       | 0,53    |         |         |         |         |      |         |                               |          |     |
| 325                 | 6,41E-05        | 9,62E-06        | 1,93E-05        | 4,04E-06 | 0       | 1,35    |         |         |         |         |      |         |                               |          |     |
| 368                 | 7,22E-05        | 6,03E-05        | 2,05E-05        | 5,99E-06 | 0       | 0,97    |         |         |         |         |      |         |                               |          |     |
| 412                 | 2,56E-05        | 2,03E-05        | 1,74E-05        | 1,57E-07 | N.A     | N.A     |         |         |         |         |      |         |                               |          |     |
| 433                 | 1,73E-05        | 3,67E-06        | 1,96E-05        | 3,37E-06 | N.A     | N.A     |         |         |         |         |      |         |                               |          |     |
| 476                 | 1,79E-05        | 1,80E-05        | 8,43E-06        | 3,57E-07 | 0,20    | 1,54    |         |         |         |         |      |         |                               |          |     |
| 520                 | 3,33E-05        | 1,63E-05        | 1,22E-05        | 8,15E-06 | N.A     | N.A     |         |         |         |         |      |         |                               |          |     |
| 564                 | 4,20E-05        | 2,01E-05        | 1,77E-05        | 1,14E-06 | 0       | 0,43    |         |         |         |         |      |         |                               |          |     |
| 608                 | 1,10E-05        | 1,52E-06        | 1,77E-05        | 1,14E-06 | 0       | 2,39    |         |         |         |         |      |         |                               |          |     |

21

22 **Table S2:** Data used in this study for BXN-LC.
