# Supplementary material for: Down in the dungeons: microbial redox reactions and geochemical transformations define the biogeochemistry of an estuarine sediment column
Source: Copernicus journal article supplement (doi:10.5194/bg-2023-62), 2023-04-13
Supplement: Supplementary file [file bg-2023-62-AC1-supplement.pdf]

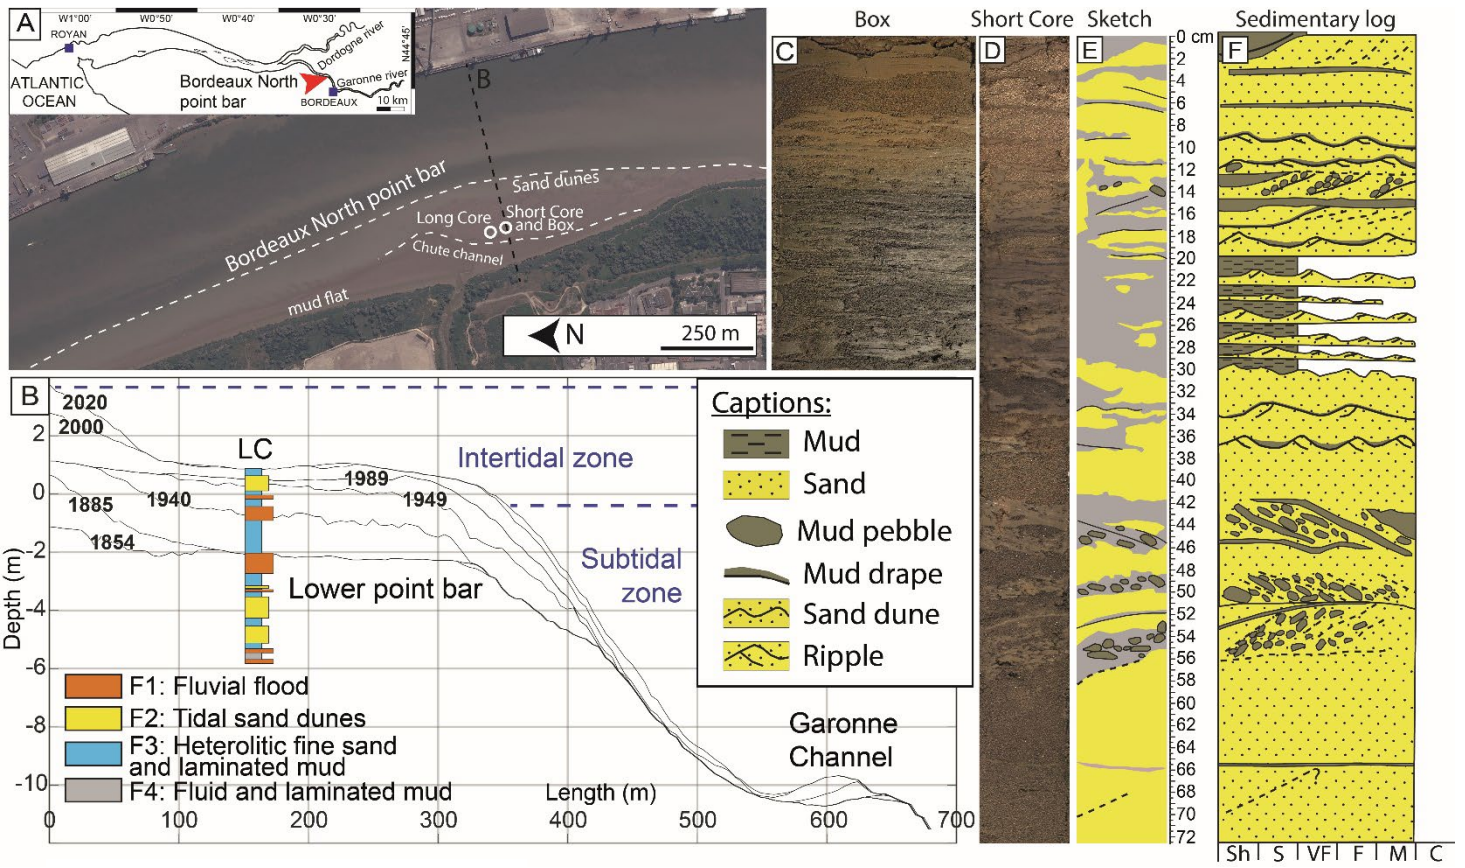

Figure 1

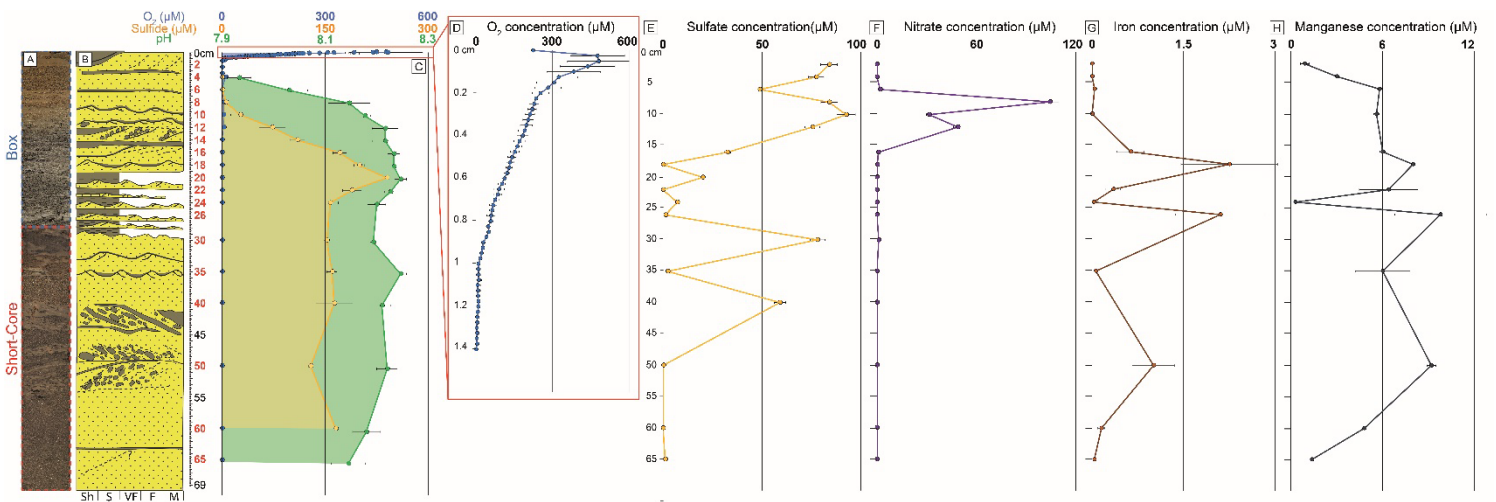

Figure 2

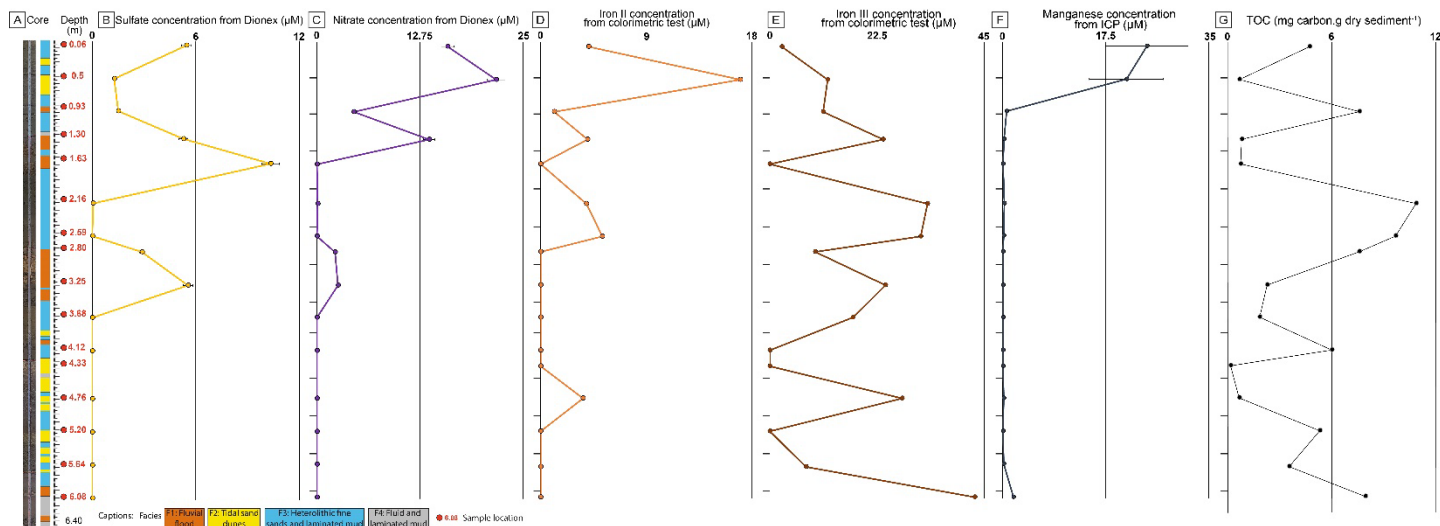

Figure 3

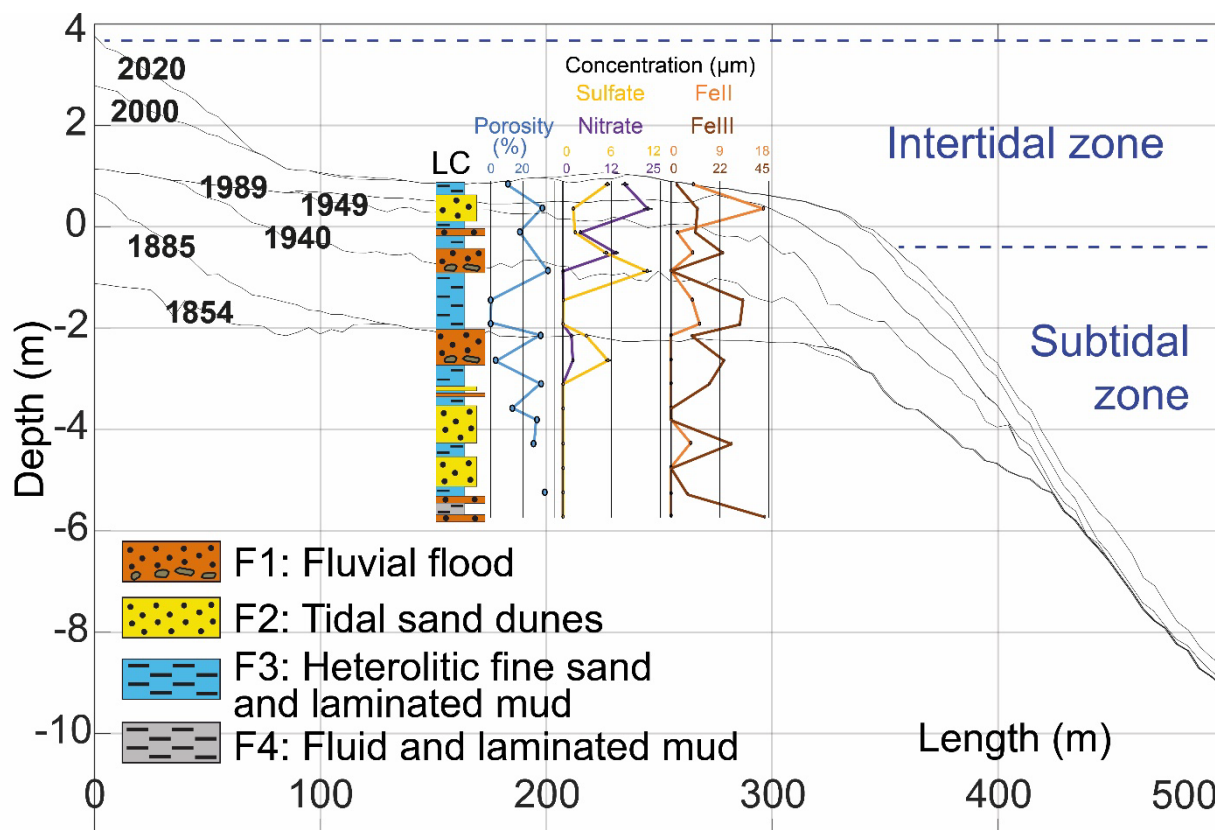

Figure 9
